# Supplementary material
Source: publisher figshare collection journal article supplement (https://acs.figshare.com/ndownloader/files/3794458)
Supplement: Supplementary file 1 [file 3794458]

## Supporting Information

### **Fe and Mn complexes of 2-carbonyl pyrrolyls; scorpionate sandwich anions and extended structures**

Lihong Li,<sup>†</sup> Guy J Clarkson,<sup>†</sup> Martin R. Lees,<sup>‡</sup> Suzanne E. Howson,<sup>†</sup> Sze-yin Tan,<sup>†</sup> Scott S. Turner,<sup>§</sup> Peter Scott<sup>†,\*</sup>

<sup>†</sup> Department of Chemistry, University of Warwick, Gibbet Hill Road, Coventry, CV4 7AL, UK

<sup>‡</sup> Department of Physics, University of Warwick, Gibbet Hill Road, Coventry, CV4 7AL, UK

<sup>§</sup> Department of Chemistry, University of Surrey, Guildford, Surrey, UK, GU2 7XH

|                                                                                                         | Page |
|---------------------------------------------------------------------------------------------------------|------|
| <b>Magnetism of [Na(THF)<sub>6</sub>][(FeL<sup>2</sup><sub>3</sub>)Na(L<sup>2</sup><sub>3</sub>Fe)]</b> | S2   |
| <b>Magnetism of [Na(THF)<sub>6</sub>][(MnL<sup>2</sup><sub>3</sub>)Na(L<sup>2</sup><sub>3</sub>Mn)]</b> | S4   |
| <b>Magnetism of [Na(THF)<sub>4</sub>][(MnL<sup>3</sup><sub>3</sub>)Na(L<sup>3</sup><sub>3</sub>Mn)]</b> | S6   |

## Magnetism of [Na(THF)<sub>6</sub>][(FeL<sub>2</sub>)<sub>3</sub>Na(L<sub>3</sub>Fe)]

The isotropic Heisenberg magnetic model (HDVV) was used to describe the magnetism of the material.

$$\mathbf{H} = -J \mathbf{S}_A \cdot \mathbf{S}_B$$

$$\mathbf{S} = \mathbf{S}_A + \mathbf{S}_B$$

$\mathbf{S}_A$ ,  $\mathbf{S}_B$  are the local spin operators

$$\chi_M = \frac{2Ng^2\beta^2}{kT} \frac{e^x + 5e^{3x} + 14e^{6x} + 30e^{10x} + 55e^{15x}}{1 + 3e^x + 5e^{3x} + 7e^{6x} + 9e^{10x} + 11e^{15x}}$$

With  $x = J/kT$  for local spins  $S_A = S_B = 5/2$ .

A least squares fit to the equation gives  $J = -1.34 \text{ cm}^{-1}$  and  $g = 1.80$ , confirming that the material is antiferromagnetic. However, possibly due to that the magnetic model does not count magnetic anisotropy of Fe(II) ion a small  $g$ -factor was obtained.

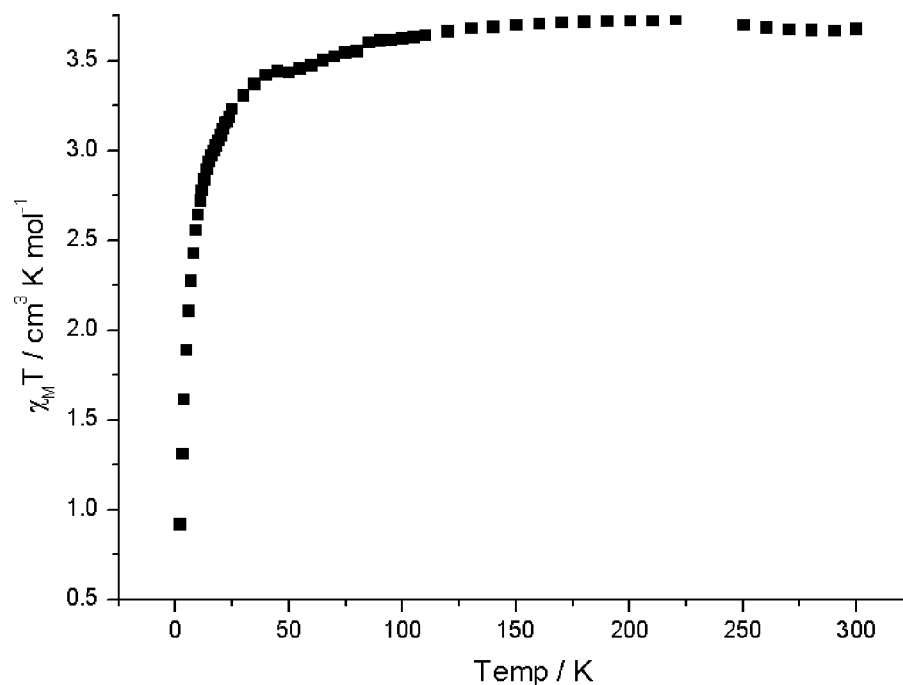

**Figure S1.**  $\chi_M T$  vs  $T$  for complex [Na(THF)<sub>6</sub>][(FeL<sub>2</sub>)<sub>3</sub>Na(L<sub>3</sub>Fe)] measured at 1000 Oe

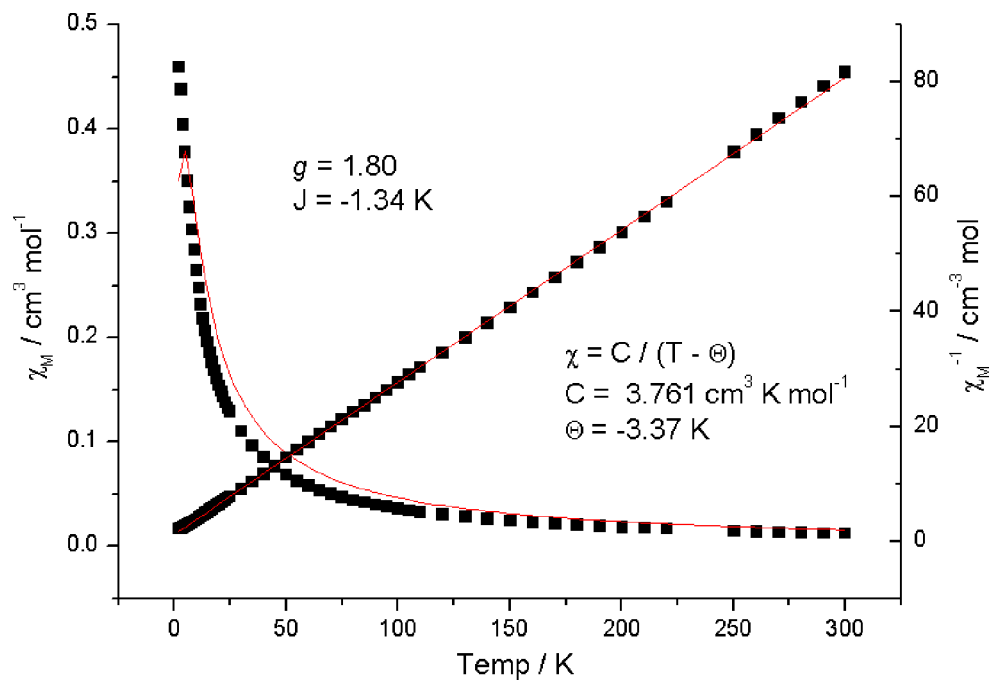

**Figure S2.**  $\chi_M'$  vs  $T$  for complex  $[\text{Na}(\text{THF})_6][(\text{FeL}^2_3)\text{Na}(\text{L}^2_3\text{Fe})]$  measured at 1000 Oe

### Magnetism of $[\text{Na}(\text{THF})_6][(\text{MnL}^2_3)\text{Na}(\text{L}^2_3\text{Mn})]$

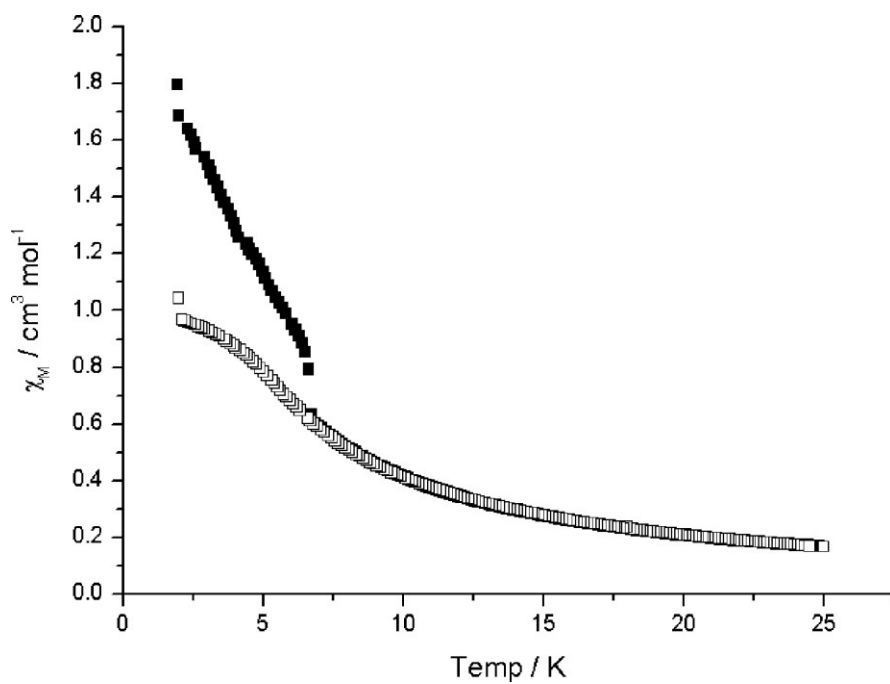

**Figure S3.** ZFCW and FCC M vs.  $T$  curves for  $[\text{Na}(\text{THF})_6][(\text{MnL}^2_3)\text{Na}(\text{L}^2_3\text{Mn})]$  measured at 1000 Oe.

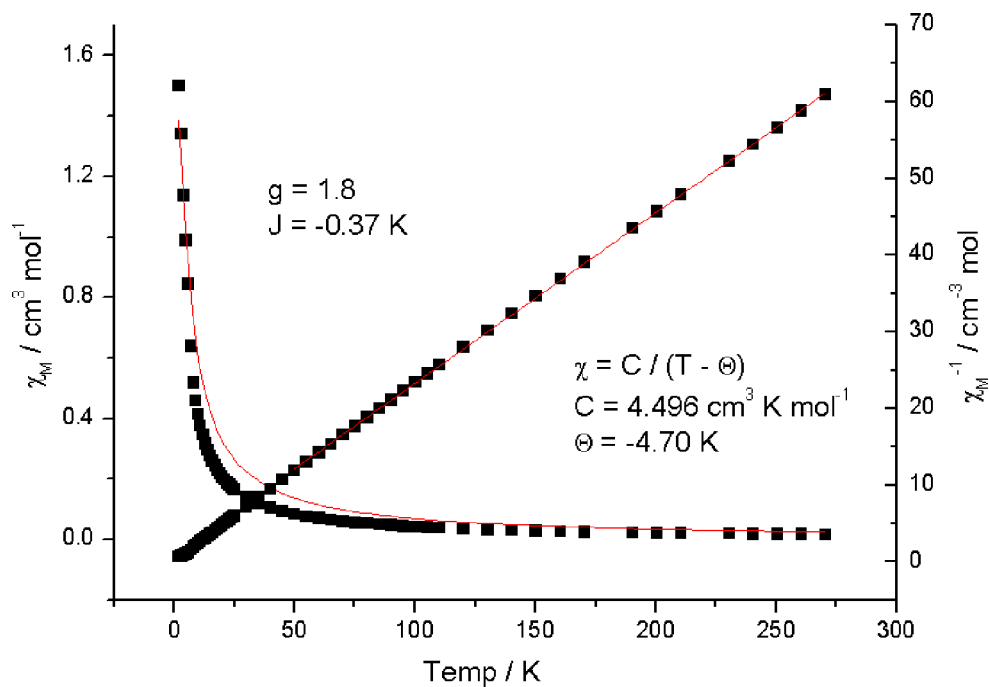

**Figure S4.**  $\chi_M$ ,  $\chi_M^{-1}$  vs.  $T$  curves for  $[\text{Na}(\text{THF})_6][(\text{MnL}^2_3)\text{Na}(\text{L}^2_3\text{Mn})]$

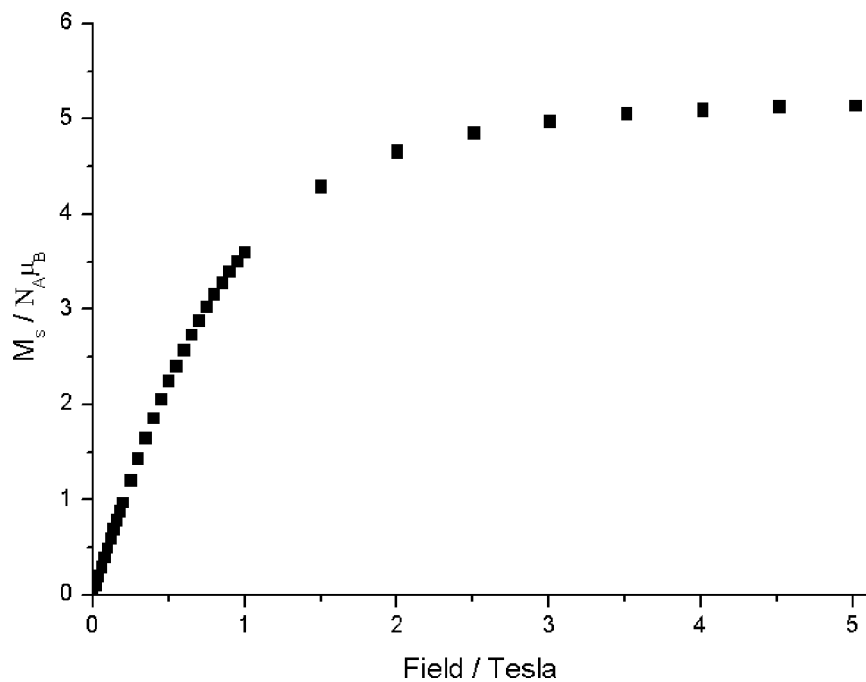

**Figure S5.**  $M$  vs.  $H$  curve for  $[\text{Na}(\text{THF})_6][(\text{MnL}^2_3)\text{Na}(\text{L}^2_3\text{Mn})]$  measured at 2 K.

### Magnetism of $[\text{Na}(\text{THF})_4][(\text{MnL}^3)_3\text{Na}(\text{L}^3\text{Mn})]$

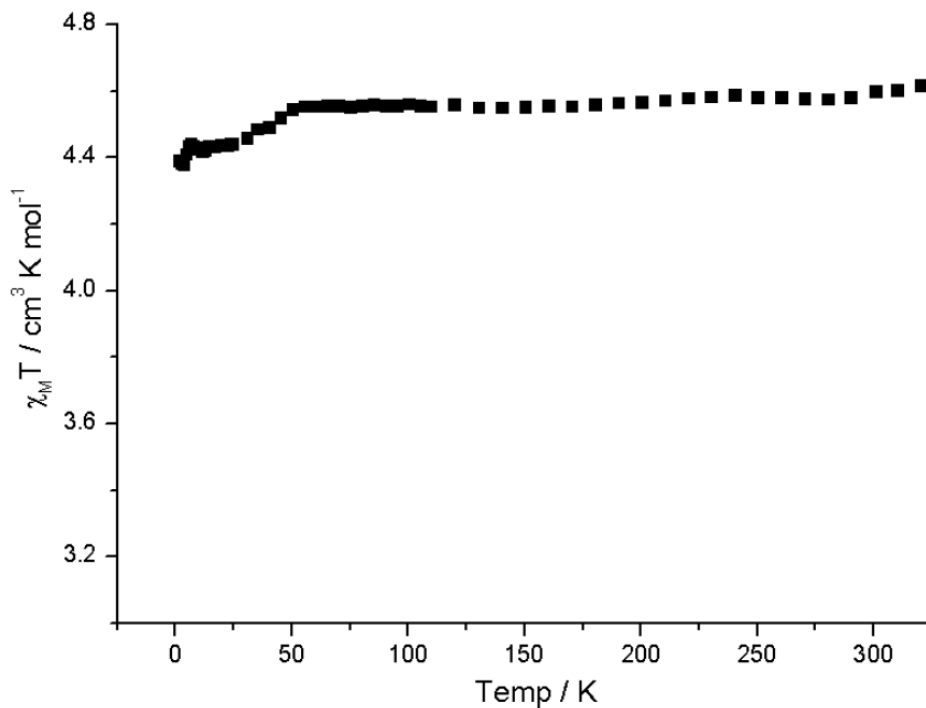

**Figure S6.**  $\chi_M T$  vs.  $T$  for  $[\text{Na}(\text{THF})_4][(\text{MnL}^3)_3\text{Na}(\text{L}^3\text{Mn})]$  measured at 1000 Oe

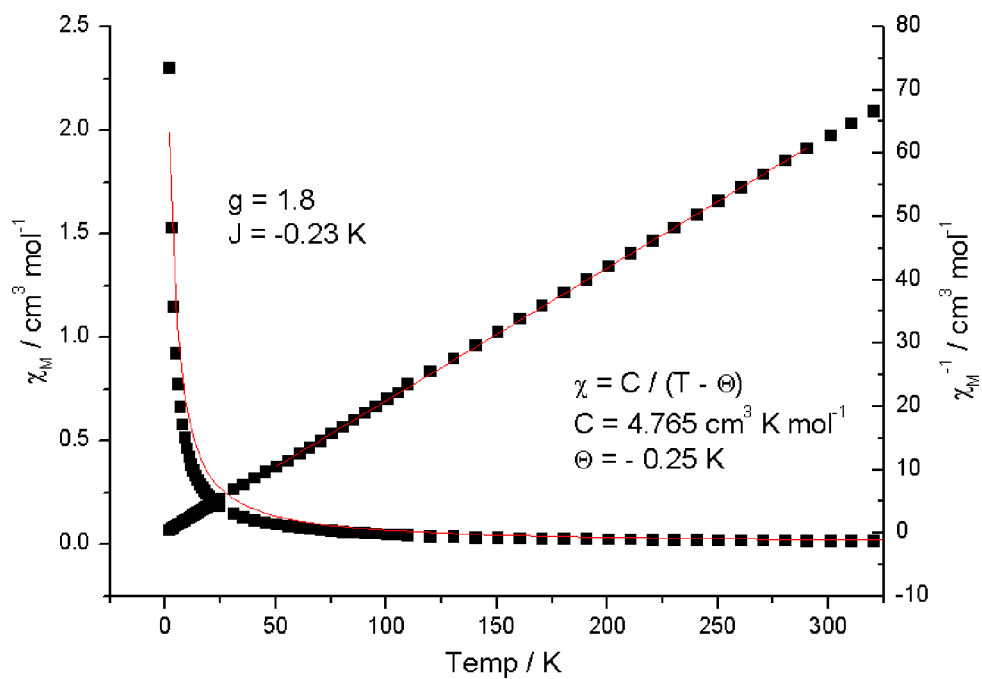

**Figure S7.**  $\chi_M$  and  $\chi_M^{-1}$  vs.  $T$  for  $[\text{Na}(\text{THF})_4][(\text{MnL}^3)_3\text{Na}(\text{L}^3\text{Mn})]$  measured at 1000 Oe
